# Supplementary material
Source: ML conference proceedings conference paper supplement (https://aclanthology.org/D15-1035)
Supplement: Attachment [file SupplementalNotes.pdf › SupplementalNotes.pdf]

# Supplemental Notes for “Noise or additional information? Leveraging crowdsource annotation item agreement for natural language tasks.”

Emily K. Jamison<sup>‡</sup> and Iryna Gurevych<sup>†‡</sup>

<sup>‡</sup>Ubiquitous Knowledge Processing Lab (UKP-TUDA),

Department of Computer Science, Technische Universität Darmstadt

<sup>†</sup> Ubiquitous Knowledge Processing Lab (UKP-DIPF),

German Institute for Educational Research

<http://www.ukp.tu-darmstadt.de>

| Training   | Biased | Stem | RTE  | POS  | Affective |
|------------|--------|------|------|------|-----------|
| Integrated | .174   | .670 | .448 | .559 | .541      |
| VeryHigh   | .145   | –    | .431 | .512 | .355      |
| HighAgree  | .142   | .673 | .495 | .572 | .393      |
| SoftLabel  | .139   | .542 | .431 | .551 | .551      |
| SLLimited  | .172   | .673 | .428 | .577 | .536      |

Table 1: Results with different training strategies for Moderate Cases.

## Overview

In this Supplemental Materials paper, we provide details on the task systems built for our main paper; these details, combined with our experiment code available on GitHub<sup>1</sup>, will enable more precise reproduction of our results.

## 1 Experiment Details

Results of Moderate Cases, which were omitted from the paper due to space but included here by request, are shown in Table 1.

### 1.1 Biased Language Detection

Although most instances had five crowdsource labels, 9% of instances had 10 labels; we used all available labels. For features, all unigrams were used. N-grams were found to outperform the list of strongly biased words in (Yano et al., 2010). N-gram size and number were tuned using development sets taken from the training data of each CV round.

Samples of Biased Language Easy Cases and Hard Cases are shown in Tables 2 and 3, respectively.

### 1.2 Morphological Stemming

Labels were acquired from Amazon Mechanical Turk (AMT), and most pairs have 5 labels; 24

<sup>1</sup>[github.com/EmilyKJamison/crowdsourcing](https://github.com/EmilyKJamison/crowdsourcing)

Word pair: rating, rate

Longest common substring = “rat”

Remainders = “ing” and “e”

Features = “\_ingE\_eE”, “t\_LingE\_teE”, “at\_ingE\_eE”

Figure 1: Feature creation for word pairs. Word boundary markers: B=beginning, E=end.

pairs have 4 labels. We used all pairs. There are no expert labels for this dataset. Examples are shown in Table 4. For features, 1000 most-frequent-in-training strings were used. Character n-grams did not increase performance beyond the features mentioned, and were not used in final experiments. An example of stemming features is shown in Table 1.

### 1.3 Recognizing Textual Entailment

Samples of *negative* and *positive* RTE pairs are shown in Tables 5 and 6, respectively.

### 1.4 POS Tagging

Sample tweets, with POS Tags and item agreement, are shown in Table 7. The gold standard was the integrated label because it outperformed expert labels.

### 1.5 Affect Recognition

In the original community task, news headlines are rated for six emotions: anger, disgust, fear, joy, sadness, and surprise; we evaluate only the *sadness* dataset, which had the highest interannotator agreement among experts,  $r=68.19$  (Strapparava and Mihalcea, 2007). Sample Hard and Easy Cases are shown in Table 8.

We implemented Snow et al. (2008)’s Affect Recognition system:

For each token  $t$  in our training set, we assign  $t$  a weight for each emotion

equal to the average emotion score observed in each headline  $H$  that  $t$  participates in. i.e., if  $\mathbf{H}_t$  is the set of headlines containing the token  $t$ , then:

$$Score(e, t) = \frac{\sum_{H \in \mathbf{H}_t} Score(e, H)}{|\mathbf{H}_t|}$$

With these weights of the individual tokens we may then compute the score for an emotion  $e$  of a news headline  $H$  as the average score over the set of tokens  $t \in H$  that we've observed in the training set, i.e.,

$$Score(e, H) = \sum_{t \in H} \frac{Score(e, t)}{|H|}$$

Where  $|H|$  is simply the number of tokens in headline  $H$ , ignoring tokens not observed in the training set. (Snow et al., 2008)

## References

- Rion Snow, Brendan O'Connor, Daniel Jurafsky, and Andrew Ng. 2008. Cheap and fast – but is it good? Evaluating non-expert annotations for natural language tasks. In *Proceedings of the 2008 Conference on Empirical Methods in Natural Language Processing*, pages 254–263, Honolulu, Hawaii.
- Carlo Strapparava and Rada Mihalcea. 2007. SemEval-2007 Task 14: Affective Text. In *Proceedings of the Fourth International Workshop on Semantic Evaluations (SemEval-2007)*, pages 70–74, Prague, Czech Republic.
- Tae Yano, Philip Resnik, and Noah A. Smith. 2010. Shedding (a thousand points of) light on biased language. In *Proceedings of the NAACL HLT 2010 Workshop on Creating Speech and Language Data with Amazon's Mechanical Turk*, pages 152–158, Los Angeles, California.

| <b>Agr</b> | <b>Label</b> | <b>Blog Text</b>                                                                                            |
|------------|--------------|-------------------------------------------------------------------------------------------------------------|
| 1.0        | 2.0          | Shes not convincing anyone , in other words , shes simply asking them to “fall in line.                     |
| 1.0        | 2.0          | Now that she ’s running for President , Clinton has changed her tune .                                      |
| 1.0        | 1.0          | Hill wins Ohio and RI. “Were going all the way ! Crowd shouts , “Yes , she will.                            |
| 0.3        | 1.8          | McCain apologists will argue that Sarah Palin was not a member of this group .                              |
| 1.0        | 1.0          | Among women , Clinton leads 64 % to 31 % .                                                                  |
| 0.3        | 1.2          | Petraeus : I am not using the word “brief or the word “pause.                                               |
| 0.3        | 1.8          | I fought in the Senate for the most extensive ethics reform since Watergate .                               |
| 1.0        | 1.0          | It ’s not the news media ’s job to make a judgment about whether they were right to do so .                 |
| 0.3        | 1.2          | These guys can run for president but they ca n’t be Secretary of the Treasury.Matthews :                    |
| 1.0        | 1.0          | Might that change in the coming days if the bailout package passes ?                                        |
| 0.3        | 1.2          | Within minutes of Thompsons exit , the Romney campaign had a reaction statement up on its web site .        |
| 0.3        | 2.8          | They died because of the Bush administrations hubris .                                                      |
| 1.0        | 1.0          | SIMMONS : I will quibble with one point that was just made .                                                |
| 1.0        | 1.0          | The original Taliban had mostly been displaced as refugees into Pakistan .                                  |
| 1.0        | 1.0          | “ I do n’t blame the Army for our son ’s death ,” Nancy says .                                              |
| 0.3        | 1.4          | So it looks like there are votes that were properly counted on Election Night , but are missing right now . |
| 0.3        | 1.2          | History might show that General David Petraeus as a great American military hero .                          |
| 0.3        | 1.4          | In the city of Tyre , too , posters showing young men killed in training exercises are cropping up .        |
| 1.0        | 1.0          | First , like McConnell , he just won re-election and wont have the distraction of personal campaigning.     |
| 0.3        | 2.2          | His “I led for patriotism , not for profit line is a slap in the face to business .                         |
| 0.3        | 1.8          | If the answers didnt reflect his views , why didnt he change them when he “jotted some notes on it ?        |
| 0.3        | 1.8          | Exit question : Which racial stereotype is the Raines ad supposedly playing on ?                            |
| 0.3        | 1.2          | 47 percent now favor “immediate withdrawal of U.S. forces , a 12-point rise since March .                   |

Table 2: Easy Case biased language text.

| <b>Agr</b> | <b>Label</b> | <b>Blog Text</b>                                                                                              |
|------------|--------------|---------------------------------------------------------------------------------------------------------------|
| -0.4       | 2.2          | And that can very easily be resolved by Senator Obama , by Mrs. Obama , by Mr. Ayers and by Ms. Dohrn . ”     |
| -0.4       | 2.0          | On Monday , he said the economy was fundamentally sound , and he was fundamentally wrong .                    |
| -0.4       | 2.2          | *** Flashback : An unhinged moonbat threw a shoe at Richard Perle in 2005 during a speech in Portland .       |
| -0.4       | 1.8          | ThinkProgress has gladly taken up the McCain challenge .                                                      |
| -0.4       | 2.0          | Without Americans getting killed , CBS does n’t see a story.And                                               |
| -0.2       | 2.0          | If Murtha loses , this will end up being remembered as the Democratic version of a “ Macaca Moment . ”        |
| -0.4       | 1.8          | Whether Palin truly understands the role of the vice president has been repeatedly called into question .     |
| -0.4       | 1.8          | But now McCain seems to be fairly certain Obama is a socialist .                                              |
| -0.4       | 1.8          | But I ’ve got to say , she ’s opposed - like John McCain is - to equal pay for equal work .                   |
| -0.4       | 1.8          | And McCains would cut taxes , cut the overall tax burden .                                                    |
| -0.4       | 2.2          | We ought to go through because theyre not telling the truth , theres no risk , it ought to be done .          |
| -0.4       | 2.0          | He has said that he really liked the ideas of the Republicans over the last 10-15 years .                     |
| -0.4       | 1.8          | Why would Palin endorse anyone , though ?                                                                     |
| -0.4       | 2.0          | Earlier this week , Rep. John Shadegg -LRB- R-AZ -RRB- called it the 2008 version of the Boston Tea Party.    |
| -0.4       | 1.8          | But the Iranian leadership does far more than issue vile insults .                                            |
| -0.4       | 1.8          | Beautiful words can not make our lives better ... Do n’t hope for a better life – vote for one. –             |
| -0.4       | 1.8          | But one of the most troubling parts of the memo concerns the offices close relationship with lobbyists .      |
| -0.4       | 2.2          | MCCAIN : We would make them shamed into it .                                                                  |
| -0.4       | 2.2          | And it includes saying and doing just about anything to win .                                                 |
| -0.4       | 2.0          | After all , Obama is the first black candidate who has a real shot at winning .                               |
| -0.4       | 2.2          | Bush smiled and made his usual quips , and many of the reporters played the game and did not press him hard . |
| -0.2       | 1.9          | Im sure Fairey did this , and Ill tell you why .                                                              |

Table 3: Hard Case biased language text.

| Stem Pairs: Negative |            |      |            |           |      | Stem Pairs: Positive |           |      |           |           |      |
|----------------------|------------|------|------------|-----------|------|----------------------|-----------|------|-----------|-----------|------|
| Original             | Stemmed    | Agr  | Original   | Stemmed   | Agr  | Original             | Stemmed   | Agr  | Original  | Stemmed   | Agr  |
| honorably            | honor      | -0.1 | whimsy     | whim      | -0.6 | railbikes            | railbike  | -0.6 | riders    | rider     | 1.0  |
| droves               | droves     | -0.6 | samplings  | sample    | -0.1 | backdated            | backdate  | -0.1 | eh        | eh        | -0.1 |
| unanimity            | unanimity  | -0.6 | alleyways  | alley way | -0.1 | vulgarity            | vulgar    | 1.0  | narrowing | narrow    | 1.0  |
| unsparing            | sparing    | -0.1 | sons       | DELETED   | -0.1 | groomer              | groom     | 1.0  | convoy    | convoy    | 1.0  |
| drubbed              | DELETED    | -0.6 | jokester   | joke      | -0.1 | magnitude            | magnitude | 1.0  | tolerance | tolerate  | -0.1 |
| jokester             | jokes      | -0.1 | reponse    | reponse   | -0.1 | agitating            | agitate   | 1.0  | patches   | patch     | -0.1 |
| reponse              | repond     | -0.1 | hauteur    | haute     | -0.6 | lifer                | life      | 1.0  | passively | passive   | 1.0  |
| declining            | declinie   | -0.1 | nascent    | DELETED   | -0.1 | samba                | samba     | 1.0  | assuming  | assume    | 1.0  |
| injunction           | injunction | -0.6 | injunction | DELETED   | -0.1 | repayed              | repay     | 1.0  | femme     | femme     | 1.0  |
| injunction           | injust     | -0.1 | zingy      | zingy     | -0.1 | confusion            | confuse   | 1.0  | moored    | moor      | 1.0  |
| foie                 | DELETED    | -0.1 | bogymen    | DELETED   | -0.6 | lawmaker             | law maker | 1.0  | currently | current   | 1.0  |
| bogymen              | bogymen    | -0.6 | voluntary  | voluntary | -0.6 | oppress              | oppress   | 1.0  | preachers | preacher  | 1.0  |
| oozing               | ooz        | -0.1 | railbikes  | rail bike | -0.1 | intact               | intact    | 1.0  | leotards  | leotard   | 1.0  |
| bunker               | bunker     | -0.6 | eh         | DELETED   | -0.1 | sods                 | sod       | 1.0  | glorying  | glory     | 1.0  |
| flyovers             | fly over   | -0.1 | pianist    | pianist   | -0.1 | reponse              | DELETED   | -0.6 | gastritis | gastritis | -0.1 |
| shek                 | shek       | -0.1 | cree       | DELETED   | -0.6 | hauteur              | hauteur   | -0.6 | disposes  | dispose   | 1.0  |
| expelled             | expell     | -0.6 | tugboats   | tugboat   | -0.1 | rabid                | rabid     | 1.0  | exorcism  | exorcise  | -0.6 |
| weeks                | weeks      | -0.1 | walkie     | walkie    | -0.6 | rumpus               | rumpus    | 1.0  | supposing | suppose   | 1.0  |
| chastity             | chastity   | -0.6 | callups    | DELETED   | -0.1 | ski                  | ski       | 1.0  | smaller   | small     | -0.1 |
| boxloads             | box load   | -0.1 | swingeing  | swing     | -0.1 | unimpeded            | impeded   | -0.1 | vanish    | vanish    | 1.0  |
| litle                | litle      | -0.1 | anchorage  | anchorage | -0.1 | wrappings            | wrapping  | 1.0  | coercive  | coerce    | 1.0  |
| faceted              | face       | -0.1 | overhung   | hung      | -0.6 | nascent              | nascent   | -0.1 | loyalists | loyalist  | 1.0  |
| proudest             | prouder    | -0.6 | former     | form      | -0.6 | manor                | manor     | 1.0  | jostle    | jostle    | 1.0  |
| plaintive            | plain      | -0.1 | former     | fore      | -0.1 | weevil               | weevil    | 1.0  | users     | user      | 1.0  |
| former               | former     | -0.6 | residence  | reside    | -0.6 | bouts                | bout      | 1.0  | workbook  | work book | 1.0  |
| creation             | creation   | -0.1 | residence  | residence | -0.6 | subsist              | subsist   | 1.0  | compere   | DELETED   | -0.1 |
| residence            | resident   | -0.1 | ost        | ost       | -0.6 | class                | class     | 1.0  | riles     | rile      | 1.0  |
| orderlies            | orderlie   | -0.1 | unrolled   | rolled    | -0.1 | didn                 | DELETED   | -0.1 | zingy     | zing      | -0.1 |
| sedative             | sedative   | -0.1 | heritable  | herit     | -0.1 | peekaboo             | peekaboo  | -0.6 | refrain   | refrain   | 1.0  |
| inimical             | DELETED    | -0.1 | palimony   | DELETED   | -0.1 | batters              | batter    | 1.0  | describes | describe  | 1.0  |
| palimony             | alimony    | -0.1 | winning    | winn      | -0.1 | shabbily             | shabby    | -0.1 | heeded    | heed      | 1.0  |
| vetch                | DELETED    | -0.1 | hacerse    | DELETED   | -0.1 | redesigns            | redesign  | 1.0  | prosper   | prosper   | 1.0  |
| hacerse              | hacer      | -0.1 | yester     | DELETED   | -0.1 | granaries            | granary   | 1.0  | frogs     | frog      | 1.0  |
| preserves            | preserves  | -0.1 | songbooks  | song book | -0.1 | soaring              | soar      | -0.1 | cree      | cree      | -0.6 |
| liftoffs             | lift off   | -0.1 | whopping   | whop      | -0.1 | affective            | affect    | 1.0  | ku        | DELETED   | -0.6 |

Table 4: Stemming word pairs with agreement and class.

| Text                                                                                                                                                                                         | Hypothesis                                                                              | Agr  |
|----------------------------------------------------------------------------------------------------------------------------------------------------------------------------------------------|-----------------------------------------------------------------------------------------|------|
| A former petty thief who converted and founded his own church, Silva is a devoted jailhouse preacher who claims to have ended 11 prison rebellions in recent years.                          | Silva was once a murderer.                                                              | 0.3  |
| Most Americans are familiar with the Food Guide Pyramid– but a lot of people don’t understand how to use it.                                                                                 | Most Americans have not heard of the Food Guide Pyramid.                                | 0.0  |
| About 85 percent of Danes belong to the state Evangelical Lutheran Church, though just 5 percent attend church services regularly.                                                           | 85 percent of Danes attend church services regularly.                                   | -0.1 |
| A Health Ministry official said 68 people were killed and 30 wounded in the blast shortly after 10 a.m. in Baquba, an often violent town 65 km north of Baghdad.                             | Baghdad is north of Baquba.                                                             | -0.1 |
| The 69-page report is also the first major product of the Betsy Lehman Center for Patient Safety and Medical Error Reduction.                                                                | The 69-page report is the first major product of medical errors.                        | -0.1 |
| Japan’s voter turnout was just over 56 percent for the Upper House elections.                                                                                                                | Less than half of the eligible Japanese voters participated in the vote.                | 0.6  |
| North Korean refugees had been gathering in southern Ho Chi Minh City, formerly Saigon, after trickling over the border from China for months.                                               | Ho Chi Minh City is now called Saigon.                                                  | -0.1 |
| Iraqi militants have repeatedly used terrorist attacks to try to force governments to withdraw from the U.S.-led occupation force.                                                           | Iraqi militants were forced to withdraw from the U.S.-led occupation force.             | -0.1 |
| Four Venezuelan firefighters who were traveling to a training course in Texas were killed when their sport utility vehicle drifted onto the shoulder of a highway and struck a parked truck. | Four firefighters were killed while saving a man stuck in a burning building.           | 0.6  |
| All but 11 of the 107 patients and all of the employees had been notified by late yesterday to come to the hospital for an evaluation and antibiotics.                                       | 11 patients out of the 107 were invited to the hospital for a check-up and antibiotics. | 0.0  |
| Mrs. Lane, who has been a Director since 1989, is Special Assistant to the Board of Trustees and to the President of Stanford University.                                                    | Mrs. Lane is the president of Stanford University.                                      | 0.0  |
| Lyon acclaims itself to be the gastronomic capital of France.                                                                                                                                | Lyon is the capital of France.                                                          | 0.3  |
| Israel captured the Gaza Strip and West Bank in the 1967 Mideast war.                                                                                                                        | The Gaza Strip and West Bank were captured by Israel in the 1976 war.                   | 0.0  |
| Fighters loyal to Moqtada al-Sadr shot down a U.S. helicopter Thursday in the holy city of Najaf.                                                                                            | A U.S. helicopter flew loyalists of Moqtada al-Sadr.                                    | 0.3  |

Table 5: Negative RTE examples, with agreement.

| Text                                                                                                                                                                                        | Hypothesis                                                                                                         | Agr  |
|---------------------------------------------------------------------------------------------------------------------------------------------------------------------------------------------|--------------------------------------------------------------------------------------------------------------------|------|
| The American Consul-General in Jerusalem, John Hearst, and an high-level Israeli officer in military uniform were among the dignitaries.                                                    | There were American and Israeli dignitaries present.                                                               | 0.3  |
| Newspapers said that every independent candidate spent between 200 thousand and 500 thousand dollars on his election campaign.                                                              | Independent candidates must spend \$50,000 on their election campaigns.                                            | -0.1 |
| The plane will be prepared for President Arafat's flight to Paris on Wednesday, after he confirmed that he would allocate his first international trip, to France.                          | Arafat will devote his first international trip to France.                                                         | 0.3  |
| The opinion poll was conducted on the sixth and seventh of October, and included a cross section of 861 adults with a margin of error estimated at 4%.                                      | The poll was carried out on the 6th and 7th of October.                                                            | 1.0  |
| 5-year-old, family prepare for risky marrow transplant.                                                                                                                                     | 5-year-old, family prepare for risky bone marrow transplant.                                                       | 0.6  |
| if you are at risk of heart problems, it is now recommended that you talk to your doctor about taking aspirin to prevent a first heart attack.                                              | Aspirin use lowers risk of heart disease.                                                                          | -0.1 |
| Five other soldiers have been ordered to face courts-martial.                                                                                                                               | Five other soldiers have been demanded to face courts-martial.                                                     | 0.6  |
| Black holes can lose mass by radiating energy in the form of "Hawking radiation".                                                                                                           | Black holes can regain some of their mass by radiating energy.                                                     | -0.1 |
| The girl's mother and grandmother have been charged with conspiracy to commit murder.                                                                                                       | The girl's mother and grandmother face charges of conspiracy to commit murder.                                     | 0.6  |
| Weekly numbers also showed that refinancing activity sailed to its highest level since January and jobless claims dropped to the lowest level since the recession began in January of 2001. | Jobless claims fall to lowest level since January 2001.                                                            | 0.3  |
| Bush returned to the White House late Saturday while his running mate was off campaigning in the West.                                                                                      | Bush left the White House.                                                                                         | -0.1 |
| The prosecutor told the court that the incident had caused "distress" to one of the children.                                                                                               | The prosecutor told the court that "distress" in one of the children is ascribed to the incident.                  | 1.0  |
| Mr Arafat's opponents still blame him for the mounting lawlessness in the Palestinian territories.                                                                                          | Mr Arafat's opponents accuse him of being responsible for the mounting lawlessness in the Palestinian territories. | 0.6  |
| On 2 February 1990, at the opening of Parliament, he declared that apartheid had failed and that the bans on political parties, including the ANC, were to be lifted.                       | Apartheid in South Africa was abolished in 1990.                                                                   | -0.1 |

Table 6: Positive RTE examples, with agreement.

| Token  | Labels                   | Agr | Token         | Labels                   | Agr |
|--------|--------------------------|-----|---------------|--------------------------|-----|
| hehehe | PRT,PRT,X,PRT,PRT        | 0.5 | @USER         | NOUN,NOUN,NOUN,NOUN,NOUN | 1.0 |
| its    | PRON,DET,VERB,PRON,PRON  | 0.2 | -lol          | NUM,X,X,NUM,NOUN         | 0.1 |
| gonna  | PRT,VERB,PRT,VERB,VERB   | 0.3 | im            | VERB,PRON,PRON,PRON,PRON | 0.5 |
| b      | VERB,PRT,PRT,VERB,VERB   | 0.3 | jk            | PRT,PRT,PRT,PRT,PRT      | 1.0 |
| a      | DET,DET,DET,DET,DET      | 1.0 | ahah          | PRT,PRT,PRT,PRT,PRT      | 1.0 |
| good   | ADJ,ADJ,ADJ,ADJ,ADJ      | 1.0 | itss          | PRON,PRON,PRT,PRON,PRT   | 0.3 |
| day    | NOUN,NOUN,NOUN,NOUN,NOUN | 1.0 | okayy         | PRT,NOUN,NOUN,ADJ,ADJ    | 0.1 |
|        |                          |     | ...           | .....PRT,PRT             | 0.3 |
| @USER  | NOUN,NOUN,NOUN,NOUN,NOUN | 1.0 | #LebronShould | X,X,X,X,X                | 1.0 |
| Lmao   | PRT,PRT,PRT,PRT,PRT      | 1.0 | know          | NOUN,VERB,VERB,VERB,VERB | 0.5 |
| oh     | PRT,PRT,..PRT,PRT        | 0.5 | his           | PRON,ADJ,PRON,PRON,PRON  | 0.5 |
| ok     | PRT,NOUN,ADJ,CONJ,NOUN   | 0.0 | only          | ADJ,ADJ,ADV,ADJ,ADP      | 0.2 |
| i      | PRON,PRON,PRON,PRON,PRON | 1.0 | championship  | NOUN,NOUN,NOUN,NOUN,NOUN | 1.0 |
| was    | VERB,VERB,VERB,VERB,VERB | 1.0 | is            | VERB,VERB,VERB,VERB,VERB | 1.0 |
| like   | CONJ,VERB,PRT,ADP,ADP    | 0.0 | ,             | .....                    | 1.0 |
| where  | ADP,ADV,ADP,PRON,ADV     | 0.1 | slam          | VERB,NOUN,ADJ,ADJ,ADJ    | 0.2 |
| is     | VERB,VERB,VERB,VERB,VERB | 1.0 | dunk          | VERB,NOUN,VERB,VERB,NOUN | 0.3 |
| she    | PRON,PRON,PRON,NOUN,NOUN | 0.3 | ,             | .....                    | 1.0 |
| at     | ADP,ADP,ADP,ADV,ADP      | 0.5 | @USER         | NOUN,NOUN,NOUN,NOUN,NOUN | 1.0 |
| I      | PRON,PRON,PRON,PRON,PRON | 1.0 | Journalists   | NOUN,NOUN,NOUN,NOUN,NOUN | 1.0 |
| wanna  | VERB,VERB,VERB,ADJ,VERB  | 0.5 | and           | CONJ,CONJ,CONJ,CONJ,CONJ | 1.0 |
| go     | VERB,VERB,VERB,VERB,VERB | 1.0 | Social        | NOUN,NOUN,ADJ,ADJ,ADJ    | 0.3 |
| to     | VERB,CONJ,VERB,ADP,ADP   | 0.1 | Media         | NOUN,NOUN,NOUN,NOUN,NOUN | 1.0 |
| a      | DET,DET,DET,DET,DET      | 1.0 | experts       | NOUN,NOUN,NOUN,NOUN,NOUN | 1.0 |
| bar    | NOUN,NOUN,NOUN,NOUN,NOUN | 1.0 | alike         | ADJ,ADJ,ADP,ADV,ADJ      | 0.2 |
| ....   | .....                    | 1.0 | will          | VERB,VERB,VERB,ADV,VERB  | 0.5 |
| not    | ADJ,ADV,ADP,ADP,ADV      | 0.1 | appreciate    | VERB,VERB,VERB,ADV,NOUN  | 0.2 |
| to     | NOUN,ADP,ADP,ADP,ADP     | 0.5 | this          | ADP,PRON,ADJ,NOUN,ADP    | 0.0 |
| drink  | VERB,VERB,VERB,ADV,VERB  | 0.5 | spoo          | NOUN,NOUN,NOUN,NOUN,NOUN | 1.0 |
| tho    | ADV,ADV,CONJ,DET,VERB    | 0.0 | out           | ADP,ADV,ADP,VERB,ADV     | 0.1 |
| ....   | .....                    | 1.0 | of            | ADP,ADP,ADP,ADP,ADP      | 1.0 |
| just   | ADJ,ADV,ADJ,ADV,ADV      | 0.3 | Dallas        | NOUN,NOUN,NOUN,NOUN,NOUN | 1.0 |
| to     | VERB,ADP,ADP,ADP,ADP     | 0.5 | :             | .....                    | 1.0 |
| get    | VERB,VERB,VERB,VERB,VERB | 1.0 | URL           | NOUN,NOUN,NOUN,NOUN,NOUN | 1.0 |
| out    | ADP,ADV,ADV,ADP,VERB     | 0.1 |               |                          |     |
| the    | DET,DET,DET,DET,DET      | 1.0 |               |                          |     |
| house  | NOUN,NOUN,NOUN,NOUN,NOUN | 1.0 |               |                          |     |

Table 7: Tweets, with crowdsourced POS labels and item agreement.

| Hard Cases |       |                                                         | Easy Cases |       |                                                  |
|------------|-------|---------------------------------------------------------|------------|-------|--------------------------------------------------|
| Agr        | Label | Headline                                                | Agr        | Label | Headline                                         |
| -0.6       | 26.0  | Ice storm smacks roads, power                           | 0.4        | 17.0  | 5000 years on but couple still hugging           |
| -0.6       | 34.5  | Two Hussein allies are hanged, Iraqi official says      | 0.4        | 12.5  | At New OZZFEST, Freedom Ain't Free               |
| -0.3       | 16.4  | Democrats plot Bush troop increase censure              | 0.7        | 5.0   | Will Rob Cohen Direct Third 'Mummy'?             |
| -0.1       | 11.7  | Really?: The claim: the pill can make you put on weight | 0.4        | 7.0   | Shareholders sue Apple                           |
| -0.6       | 48.4  | Storms kill, knock out power, cancel flights            | 0.7        | 0.0   | Sights and sounds from CES                       |
| -0.3       | 28.1  | Vaccine mandate upsets legislators                      | 0.4        | 5.0   | Defense to challenge Russert's credibility       |
| -0.6       | 33.5  | Iran says it will strike US interests if Attacked       | 0.4        | 7.4   | 5 money makeovers                                |
| -0.5       | 65.5  | Aquarium puts ailing beluga whale to sleep              | 0.7        | 5.0   | Federer handed tough Aussie draw                 |
| -0.6       | 45.5  | Israelis retaliate after attack by Lebanese Army        | 0.4        | 3.0   | News analysis: Iranian boast is put to test      |
| -0.7       | 35.6  | Panel issues bleak report on climate change             | 0.7        | 0.1   | EU will urge China to go green                   |
| -0.5       | 40.5  | Deadly bird flu confirmed in British Turkeys            | 0.7        | 4.5   | Palestinian factions to resume talks             |
| -0.4       | 28.5  | Closings and cancellations top advice on flu outbreak   | 0.4        | 1.0   | Schuey sees Ferrari unveil new car               |
| -0.4       | 23.0  | CIA leak trial summary                                  | 0.7        | 10.0  | Ozzy, a Hero for the hard-rocking masses         |
| -0.2       | 37.0  | A police state? The issues                              | 0.4        | 2.7   | BB star Jackson denies Goody comments            |
| -0.5       | 39.0  | Too little sleep may mean too fat kids                  | 0.7        | 2.0   | Merck: Gardasil may fight more strains           |
| -0.6       | 32.5  | Outcry at N Korea 'nuclear test'                        | 1.0        | 0.0   | Microsoft, Sony, we have a problem               |
| -0.7       | 61.7  | Trucks swallowed in subway collapse                     | 0.7        | 10.0  | 17th-Century Remedy; 21st-Century Potency        |
| -0.4       | 52.9  | Two detained in body parts mailing                      | 0.4        | 2.7   | Ganguly handed India squad call-up               |
| -0.5       | 73.4  | Iraq car bombings kill 22 People, wound more than 60    | 0.7        | 1.2   | Inter Milan set Serie A win record               |
| -0.2       | 93.5  | Bathing mom awakes to find baby dead                    | 0.4        | 2.4   | Bears fan loses bet and changes name             |
| -0.7       | 41.0  | Russia plans major military build-up                    | 0.7        | 10.0  | Turner pays for Boston "bombing"                 |
| -0.5       | 35.1  | Asian nations urge Myanmar reform                       | 0.7        | 0.0   | Virtual 'American Idol' hits right notes         |
| -0.5       | 72.4  | Teacher charged with sex assault                        | 0.7        | 2.0   | Dance movie takes over No. 1                     |
| -0.7       | 50.5  | Archaeologists find remains of couple locked in a hug   | 0.7        | 6.5   | US Airways boosts bid for Delta                  |
| -0.4       | 26.9  | Building a memorial to a son, one child at a time       | 0.7        | 2.5   | Discovered boys bring shock, joy                 |
| -0.1       | 12.5  | After Iraq trip, Clinton proposes war limits            | 0.4        | 16.5  | Move to ban iPods from crossing the street       |
| -0.4       | 50.0  | Hussein's niece pleads for father's life                | 1.0        | 0.0   | 'Sunshine' Goydos wins Sony open                 |
| -0.4       | 50.5  | Cheney to Congress: Can't run Iraq war by committee     | 0.7        | 2.0   | Sarkozy letter surprises French cartoons hearing |
| -0.6       | 72.3  | 7 dead in apartment building fire                       | 0.4        | 1.1   | Press sees hope in Mecca talks                   |
| -0.5       | 59.0  | Global National Major child porn ring bust              | 0.4        | 1.1   | Bernhard set to leave Volkswagen                 |
| -0.6       | 55.4  | Filipino woman kidnapped in Nigeria                     | 0.7        | 8.0   | India's Taj Mahal gets facelift                  |
| -0.6       | 50.0  | Mountain glaciers melting faster, United Nations says   | 1.0        | 0.0   | 'Stomp' steps to No. 1 at box office             |

Table 8: Affective Text "Sadness" dataset, Hard (agreement <0) and Easy Cases (agreement >0.4).
